# Supplementary material for: A Regulatory Checkpoint during Flagellar Biogenesis in Campylobacter jejuni Initiates Signal Transduction To Activate Transcription of Flagellar Genes
Source: PubMed Central journal article supplement — mBio. 2013 Sep 3;4(5):e00432-13. doi: 10.1128/mBio.00432-13 (PMC3760246; doi:10.1128/mbio.00432-13), 2013-09-03
Supplement: mbo004131615sf01.pdf [file mbo004131615sf01.pdf]

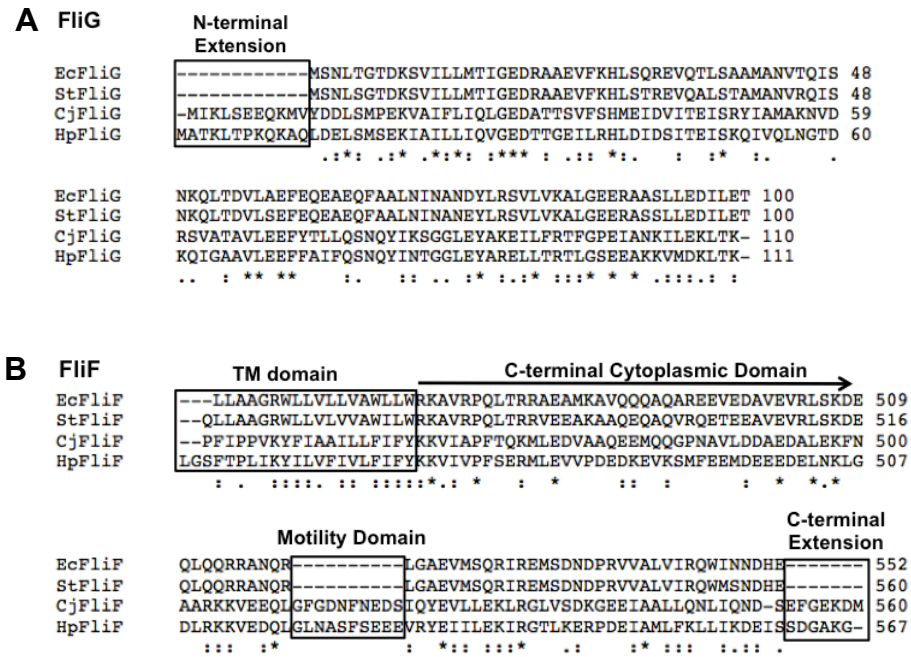

**Figure S1. Alignment of the N-terminal FliG and C-terminal FliF domains from *E. coli*, *Salmonella*, *C. jejuni*, and *H. pylori*.** (A) ClustalW alignment of the N-terminal domains of FliG from *E. coli* strain K-12 [BAA15764], *S. typhimurium* strain LT2 [AAL20882], *C. jejuni* 81-176 [EAQ73253], and *H. pylori* strain G27 [ACI27095]. The N-terminal extension present in *C. jejuni* and *H. pylori* FliG is indicated in a box. (B) ClustalW alignment of the C-terminal transmembrane (TM) and cytoplasmic domains of FliF proteins from *E. coli* strain K-12 [YP\_490192], *S. typhimurium* LT2 [AAL20881], *C. jejuni* 81-176 [EAQ73453], and *H. pylori* G27 [ACI27094]. The transmembrane (TM) domain predicted in all proteins is boxed. The domain of *C. jejuni* FliF encompassed by G511-S520 that is required for motility but not signal transduction and the C-terminal extension present in *C. jejuni* FliF are indicated with boxes.
