# Supplementary material for: A Regulatory Checkpoint during Flagellar Biogenesis in Campylobacter jejuni Initiates Signal Transduction To Activate Transcription of Flagellar Genes
Source: PubMed Central journal article supplement — mBio. 2013 Sep 3;4(5):e00432-13. doi: 10.1128/mBio.00432-13 (PMC3760246; doi:10.1128/mbio.00432-13), 2013-09-03
Supplement: mbo004131615sf02.pdf [file mbo004131615sf02.pdf]

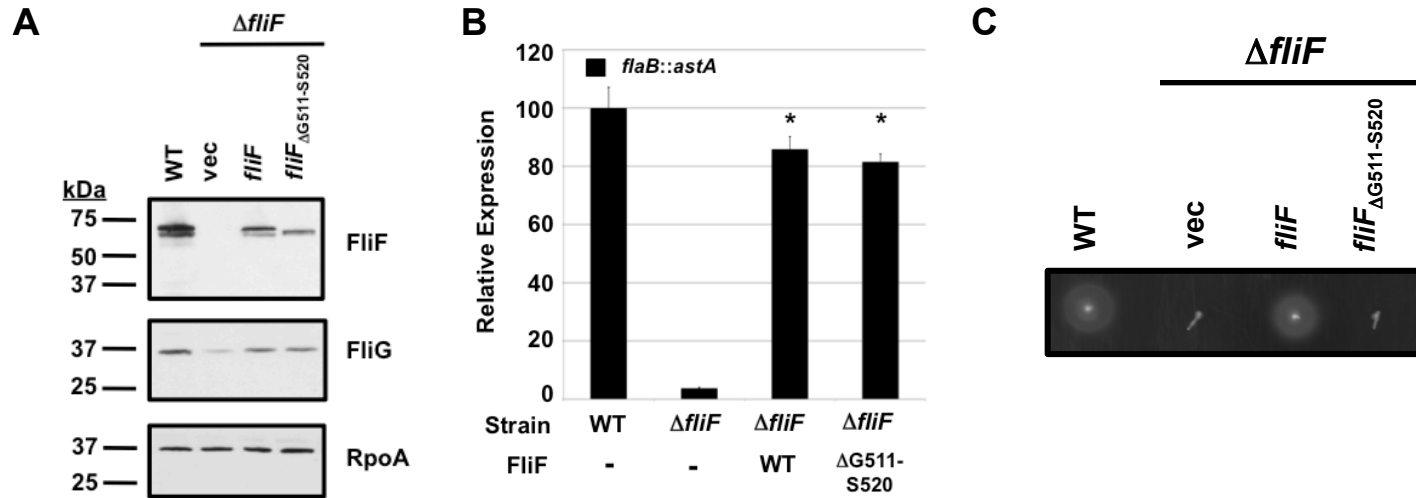

**Figure S2. Analysis of the ability of *C. jejuni* FliF <sub>$\Delta G511-S520$</sub>  to support *flaB::astA* expression and motility.** Wild-type *C. jejuni* or *C. jejuni*  $\Delta fliF$  complemented with vector alone (vec or -) or plasmid containing wild-type *fliF* or *fliF* <sub>$\Delta G511-S520$</sub>  were analyzed for (A) production of FliF and FliG, (B) *flaB::astA* expression, or (C) motility. (A) Immunoblot analysis of FliF, FliG, and RpoA production in whole cell lysates of *C. jejuni* strains. Proteins were detected by specific antisera. (B) Arylsulfatase assay examining expression of the *flaB::astA* transcriptional fusion in wild-type *C. jejuni* or  $\Delta fliF$  complemented with vector alone (vec) or plasmid containing wild-type *fliF* or *fliF* <sub>$\Delta G511-S520$</sub> . The level of *flaB::astA* expression in each complemented *fliF* mutant is relative to wild-type *C. jejuni*, which was set to 100 units. Error bars indicate standard deviation of the average arylsulfatase activity analyzed from three samples. “\*” indicates a complemented mutant with significantly different level of reporter activity than  $\Delta fliF$  harboring vector alone ( $P$ -value < 0.05). (C) Motility of strains after 24 h after inoculation in semi-solid MH agar and incubation at 37 °C in microaerobic conditions.
