# Supplementary material for: A Regulatory Checkpoint during Flagellar Biogenesis in Campylobacter jejuni Initiates Signal Transduction To Activate Transcription of Flagellar Genes
Source: PubMed Central journal article supplement — mBio. 2013 Sep 3;4(5):e00432-13. doi: 10.1128/mBio.00432-13 (PMC3760246; doi:10.1128/mbio.00432-13), 2013-09-03
Supplement: mbo004131615sf03.pdf [file mbo004131615sf03.pdf]

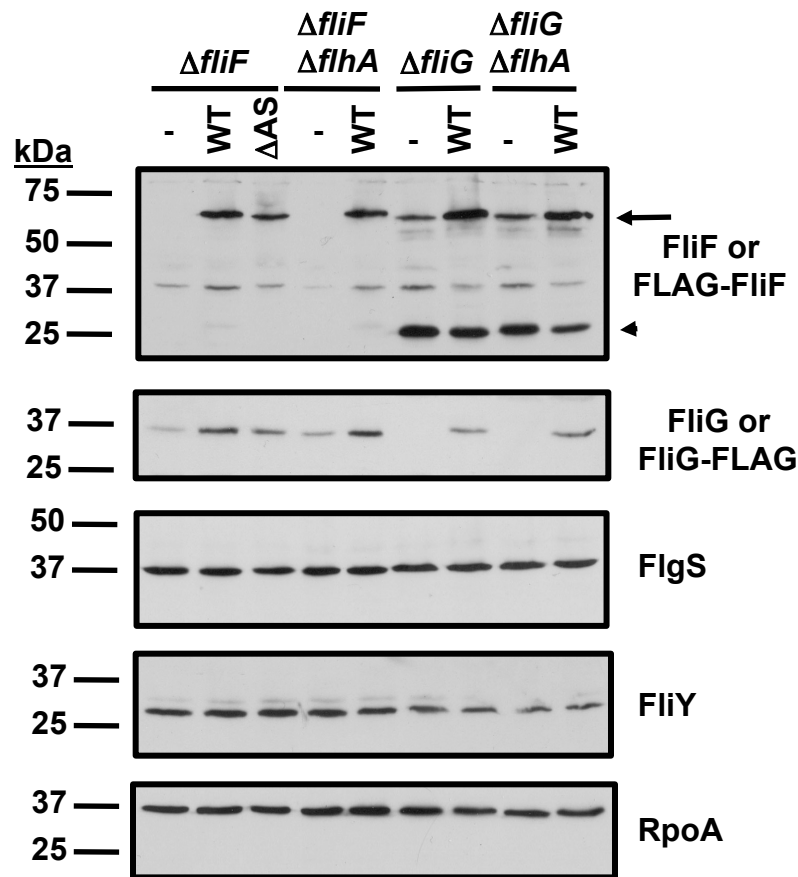

**Figure S3. Analysis of production of proteins in *C. jejuni* strains used in co-immunoprecipitation assays.** Immunoblot analysis of production of wild-type FliF, FLAG-wild-type FliF, FLAG-FliF<sub>ΔA175-S176</sub>, wild-type FliG, wild-type FliG-FLAG, FlgS, FliY, and RpoA in whole-cell lysates of *C. jejuni* strains. The *C. jejuni* strains included ΔfliF, ΔfliF ΔflhA, ΔfliG, or ΔfliG ΔflhA mutants containing plasmid that expressed the FLAG-tag alone (-), FLAG-wild-type FliF, FLAG-FliF<sub>ΔA175-S176</sub> (ΔAS), or wild-type FliG-FLAG. FLAG-tagged FliF proteins were only expressed in the ΔflhF and ΔfliF ΔflhA mutants and wild-type FliG-FLAG was only expressed in the ΔfliG and ΔfliG ΔflhA mutants. All proteins were detected with specific antisera. Arrow indicates wild-type FliF or FLAG-wild-type FliF and arrowhead indicates a truncated FliF protein.
