# Supplementary material for: A Regulatory Checkpoint during Flagellar Biogenesis in Campylobacter jejuni Initiates Signal Transduction To Activate Transcription of Flagellar Genes
Source: PubMed Central journal article supplement — mBio. 2013 Sep 3;4(5):e00432-13. doi: 10.1128/mBio.00432-13 (PMC3760246; doi:10.1128/mbio.00432-13), 2013-09-03
Supplement: mbo004131615st1.pdf [file mbo004131615st1.pdf]

**Table S1. Bacterial strains used in this study**

| Strain                | Genotype                                                                                                                                                                                                                       | Source/Reference    |
|-----------------------|--------------------------------------------------------------------------------------------------------------------------------------------------------------------------------------------------------------------------------|---------------------|
| DH5 $\alpha$          | <i>E. coli supE44</i> $\Delta$ lacU169 ( $\phi$ 80lacZ $\Delta$ M15)<br><i>hsdR17 recA1 endA1 gyrA96 thi-1 relA1</i>                                                                                                           | Invitrogen          |
| DH5 $\alpha$ /RK212.1 | DH5 $\alpha$ with conjugation transfer element                                                                                                                                                                                 | (14)                |
| BL21(DE3)             | <i>E. coli fhuA2 [lon] ompT gal</i> ( $\lambda$ DE3) [ <i>dcm</i> ]<br>$\Delta$ <i>hsdS</i> $\lambda$ DE3 = $\lambda$ <i>sBamHIo</i> $\Delta$ <i>EcoRI-B</i><br><i>int::(lacI::PlacUV5::T7 gene1) i21</i> $\Delta$ <i>nin5</i> | New England Biolabs |
| 81-176                | wild-type <i>C. jejuni</i> clinical isolate                                                                                                                                                                                    | (1)                 |
| DRH461                | 81-176 <i>rpsL</i> <sup>Sm</sup> $\Delta$ <i>astA</i>                                                                                                                                                                          | (4)                 |
| DRH665                | 81-176 <i>rpsL</i> <sup>Sm</sup> $\Delta$ <i>astA</i> <i>flaB::astA-kan</i>                                                                                                                                                    | (4)                 |
| DRH749                | 81-176 <i>rpsL</i> <sup>Sm</sup> $\Delta$ <i>astA</i> $\Delta$ <i>flgR</i>                                                                                                                                                     | (4)                 |
| DRH755                | 81-176 <i>rpsL</i> <sup>Sm</sup> $\Delta$ <i>fliR</i>                                                                                                                                                                          | (4)                 |
| DRH842                | 81-176 <i>rpsL</i> <sup>Sm</sup> $\Delta$ <i>astA</i> $\Delta$ <i>flgR</i> <i>flaB::astA-kan</i>                                                                                                                               | (4)                 |
| DRH911                | 81-176 <i>rpsL</i> <sup>Sm</sup> $\Delta$ <i>astA</i> $\Delta$ <i>flgS</i>                                                                                                                                                     | (4)                 |
| DRH939                | 81-176 <i>rpsL</i> <sup>Sm</sup> $\Delta$ <i>astA</i> $\Delta$ <i>flgS</i> <i>flaB::astA-kan</i>                                                                                                                               | (4)                 |
| DRH979                | 81-176 <i>rpsL</i> <sup>Sm</sup> $\Delta$ <i>astA</i> $\Delta$ <i>flhA</i>                                                                                                                                                     | (4)                 |
| DRH1049               | 81-176 <i>rpsL</i> <sup>Sm</sup> $\Delta$ <i>astA</i> $\Delta$ <i>flhA</i> <i>flaB::astA-kan</i>                                                                                                                               | (4)                 |
| DRH1016               | 81-176 <i>rpsL</i> <sup>Sm</sup> $\Delta$ <i>astA</i> $\Delta$ <i>fliP</i>                                                                                                                                                     | (4)                 |
| DRH1647               | 81-176 <i>rpsL</i> <sup>Sm</sup> <i>astA::cat-rpsL</i> $\Delta$ <i>fliR</i>                                                                                                                                                    | This study          |
| DRH1701               | 81-176 <i>rpsL</i> <sup>Sm</sup> $\Delta$ <i>astA</i> $\Delta$ <i>fliR</i>                                                                                                                                                     | This study          |
| DRH1734               | 81-176 <i>rpsL</i> <sup>Sm</sup> $\Delta$ <i>astA</i> $\Delta$ <i>fliB</i>                                                                                                                                                     | (5)                 |
| DRH1876               | 81-176 <i>rpsL</i> <sup>Sm</sup> $\Delta$ <i>astA</i> <i>fliF::cat-rpsL</i>                                                                                                                                                    | This study          |
| DRH2077               | 81-176 <i>rpsL</i> <sup>Sm</sup> $\Delta$ <i>astA</i> $\Delta$ <i>fliF</i>                                                                                                                                                     | This study          |
| DRH2113               | 81-176 <i>rpsL</i> <sup>Sm</sup> $\Delta$ <i>astA</i> $\Delta$ <i>fliF</i> <i>flaB::astA-kan</i>                                                                                                                               | This study          |
| DRH2305               | 81-176 <i>rpsL</i> <sup>Sm</sup> $\Delta$ <i>astA</i> <i>fliQ::cat-rpsL</i>                                                                                                                                                    | This study          |
| DRH2468               | 81-176 <i>rpsL</i> <sup>Sm</sup> $\Delta$ <i>astA</i> $\Delta$ <i>flgH</i>                                                                                                                                                     | This study          |
| JMB575                | 81-176 <i>rpsL</i> <sup>Sm</sup> $\Delta$ <i>astA</i> $\Delta$ <i>fliE</i> <i>flaB::astA-kan</i>                                                                                                                               | This study          |
| JMB577                | 81-176 <i>rpsL</i> <sup>Sm</sup> $\Delta$ <i>astA</i> $\Delta$ <i>flgB</i> <i>flaB::astA-kan</i>                                                                                                                               | This study          |
| JMB1078               | 81-176 <i>rpsL</i> <sup>Sm</sup> $\Delta$ <i>astA</i> $\Delta$ <i>flgC</i> <i>flaB::astA-kan</i>                                                                                                                               | This study          |
| JMB1161               | 81-176 <i>rpsL</i> <sup>Sm</sup> $\Delta$ <i>astA</i> <i>fliG::cat-rpsL</i>                                                                                                                                                    | This study          |
| JMB1163               | 81-176 <i>rpsL</i> <sup>Sm</sup> $\Delta$ <i>astA</i> <i>fliM::cat-rpsL</i>                                                                                                                                                    | This study          |
| JMB1230               | 81-176 <i>rpsL</i> <sup>Sm</sup> $\Delta$ <i>astA</i> $\Delta$ <i>flgF</i>                                                                                                                                                     | This study          |
| JMB1242               | 81-176 <i>rpsL</i> <sup>Sm</sup> $\Delta$ <i>astA</i> $\Delta$ <i>fliG</i>                                                                                                                                                     | This study          |
| JMB1251               | 81-176 <i>rpsL</i> <sup>Sm</sup> $\Delta$ <i>astA</i> $\Delta$ <i>flgF</i> <i>flaB::astA-kan</i>                                                                                                                               | This study          |
| JMB1258               | 81-176 <i>rpsL</i> <sup>Sm</sup> $\Delta$ <i>astA</i> $\Delta$ <i>fliG</i> <i>flaB::astA-kan</i>                                                                                                                               | This study          |
| JMB1407               | 81-176 <i>rpsL</i> <sup>Sm</sup> $\Delta$ <i>astA</i> <i>fliN::cat-rpsL</i>                                                                                                                                                    | This study          |
| JMB1415               | 81-176 <i>rpsL</i> <sup>Sm</sup> $\Delta$ <i>astA</i> $\Delta$ <i>fliM</i>                                                                                                                                                     | This study          |
| JMB1417               | 81-176 <i>rpsL</i> <sup>Sm</sup> $\Delta$ <i>astA</i> $\Delta$ <i>fliM</i> <i>flaB::astA-kan</i>                                                                                                                               | This study          |
| JMB1467               | 81-176 <i>rpsL</i> <sup>Sm</sup> $\Delta$ <i>astA</i> $\Delta$ <i>fliF</i> /pDRH2309                                                                                                                                           | This study          |
| JMB1507               | 81-176 <i>rpsL</i> <sup>Sm</sup> $\Delta$ <i>astA</i> $\Delta$ <i>fliF</i> <i>flaB::astA-kan</i> /pDRH2309                                                                                                                     | This study          |

|         |                                                                                                                        |            |
|---------|------------------------------------------------------------------------------------------------------------------------|------------|
| JMB1517 | 81-176 <i>rpsL</i> <sup>Sm</sup> $\Delta$ <i>astA</i> <i>fliG</i> $\Delta$ MCD                                         | This study |
| JMB1555 | 81-176 <i>rpsL</i> <sup>Sm</sup> $\Delta$ <i>astA</i> $\Delta$ <i>fliF</i> /pJMB1518                                   | This study |
| JMB1576 | 81-176 <i>rpsL</i> <sup>Sm</sup> $\Delta$ <i>astA</i> $\Delta$ <i>fliF</i> /pJMB1560                                   | This study |
| JMB1579 | 81-176 <i>rpsL</i> <sup>Sm</sup> $\Delta$ <i>astA</i> $\Delta$ <i>fliF</i> /pJMB1561                                   | This study |
| JMB1629 | 81-176 <i>rpsL</i> <sup>Sm</sup> $\Delta$ <i>astA</i> $\Delta$ <i>fliF</i> /pJMB1609                                   | This study |
| JMB1641 | 81-176 <i>rpsL</i> <sup>Sm</sup> $\Delta$ <i>astA</i> <i>fliG</i> $\Delta$ CTD                                         | This study |
| JMB1665 | 81-176 <i>rpsL</i> <sup>Sm</sup> $\Delta$ <i>astA</i> $\Delta$ <i>fliF</i> <i>flaB</i> :: <i>astA-kan</i><br>/pJMB1609 | This study |
| JMB1669 | 81-176 <i>rpsL</i> <sup>Sm</sup> $\Delta$ <i>astA</i> <i>fliG</i> $\Delta$ CTD <i>flaB</i> :: <i>astA-kan</i>          | This study |
| JMB1741 | 81-176 <i>rpsL</i> <sup>Sm</sup> $\Delta$ <i>astA</i> <i>fliN</i> :: <i>cat-rpsL</i><br><i>flaB</i> :: <i>astA-kan</i> | This study |
| JMB1748 | 81-176 <i>rpsL</i> <sup>Sm</sup> $\Delta$ <i>astA</i> <i>fliG</i> $\Delta$ MD                                          | This study |
| JMB1756 | 81-176 <i>rpsL</i> <sup>Sm</sup> $\Delta$ <i>astA</i> <i>fliG</i> $\Delta$ NTD                                         | This study |
| JMB1767 | 81-176 <i>rpsL</i> <sup>Sm</sup> $\Delta$ <i>astA</i> $\Delta$ <i>fliF</i> /pJMB1505                                   | This study |
| JMB1771 | 81-176 <i>rpsL</i> <sup>Sm</sup> $\Delta$ <i>astA</i> $\Delta$ <i>fliA</i> <i>fliG</i> :: <i>cat-rpsL</i>              | This study |
| JMB1774 | 81-176 <i>rpsL</i> <sup>Sm</sup> $\Delta$ <i>astA</i> $\Delta$ <i>fliA</i> <i>fliF</i> :: <i>cat-rpsL</i>              | This study |
| JMB1777 | 81-176 <i>rpsL</i> <sup>Sm</sup> $\Delta$ <i>astA</i> <i>fliG</i> $\Delta$ NTD <i>flaB</i> :: <i>astA-kan</i>          | This study |
| JMB1779 | 81-176 <i>rpsL</i> <sup>Sm</sup> $\Delta$ <i>astA</i> <i>fliG</i> $\Delta$ MD <i>flaB</i> :: <i>astA-kan</i>           | This study |
| JMB1805 | 81-176 <i>rpsL</i> <sup>Sm</sup> $\Delta$ <i>astA</i> <i>fliG</i> $\Delta$ MCD <i>flaB</i> :: <i>astA-kan</i>          | This study |
| JMB1815 | 81-176 <i>rpsL</i> <sup>Sm</sup> $\Delta$ <i>astA</i> $\Delta$ <i>fliG</i> $\Delta$ <i>fliA</i>                        | This study |
| JMB1821 | 81-176 <i>rpsL</i> <sup>Sm</sup> $\Delta$ <i>astA</i> $\Delta$ <i>fliF</i> $\Delta$ <i>fliA</i>                        | This study |
| JMB1903 | 81-176 <i>rpsL</i> <sup>Sm</sup> $\Delta$ <i>astA</i> $\Delta$ <i>fliG</i> /pJMB1746                                   | This study |
| JMB1960 | 81-176 <i>rpsL</i> <sup>Sm</sup> $\Delta$ <i>astA</i> <i>fliF</i> $\Delta$ A175-S176                                   | This study |
| JMB2004 | 81-176 <i>rpsL</i> <sup>Sm</sup> $\Delta$ <i>astA</i> <i>flgI</i> :: <i>cat-rpsL</i>                                   | This study |
| JMB2008 | 81-176 <i>rpsL</i> <sup>Sm</sup> $\Delta$ <i>astA</i> <i>fliY</i> :: <i>cat-rpsL</i>                                   | This study |
| JMB2020 | 81-176 <i>rpsL</i> <sup>Sm</sup> $\Delta$ <i>astA</i> <i>fliY</i> :: <i>cat-rpsL</i><br><i>flaB</i> :: <i>astA-kan</i> | This study |
| JMB2044 | 81-176 <i>rpsL</i> <sup>Sm</sup> $\Delta$ <i>astA</i> $\Delta$ <i>flgH</i> <i>flaB</i> :: <i>astA-kan</i>              | This study |
| JMB2046 | 81-176 <i>rpsL</i> <sup>Sm</sup> $\Delta$ <i>astA</i> $\Delta$ <i>fliF</i> /pJMB2032                                   | This study |
| JMB2061 | 81-176 <i>rpsL</i> <sup>Sm</sup> $\Delta$ <i>astA</i> $\Delta$ <i>fliF</i> /pDAR965                                    | This study |
| JMB2064 | 81-176 <i>rpsL</i> <sup>Sm</sup> $\Delta$ <i>astA</i> <i>fliF</i> $\Delta$ A175-S176 <i>flaB</i> :: <i>astA-kan</i>    | This study |
| JMB2069 | 81-176 <i>rpsL</i> <sup>Sm</sup> $\Delta$ <i>astA</i> <i>flgI</i> :: <i>cat-rpsL</i><br><i>flaB</i> :: <i>astA-kan</i> | This study |
| JMB2104 | 81-176 <i>rpsL</i> <sup>Sm</sup> $\Delta$ <i>astA</i> $\Delta$ <i>fliF</i> /pECO102                                    | This study |
| JMB2113 | 81-176 <i>rpsL</i> <sup>Sm</sup> $\Delta$ <i>astA</i> $\Delta$ <i>fliG</i> /pJMB2074                                   | This study |
| JMB2116 | 81-176 <i>rpsL</i> <sup>Sm</sup> $\Delta$ <i>astA</i> $\Delta$ <i>fliG</i> /pJMB2071                                   | This study |
| JMB2124 | 81-176 <i>rpsL</i> <sup>Sm</sup> $\Delta$ <i>astA</i> $\Delta$ <i>fliG</i> $\Delta$ <i>fliA</i> /pCE107                | This study |
| JMB2127 | 81-176 <i>rpsL</i> <sup>Sm</sup> $\Delta$ <i>astA</i> $\Delta$ <i>fliG</i> $\Delta$ <i>fliA</i> /pJMB1746              | This study |
| JMB2130 | 81-176 <i>rpsL</i> <sup>Sm</sup> $\Delta$ <i>astA</i> $\Delta$ <i>fliF</i> $\Delta$ <i>fliA</i> /pDAR965               | This study |
| JMB2133 | 81-176 <i>rpsL</i> <sup>Sm</sup> $\Delta$ <i>astA</i> $\Delta$ <i>fliF</i> $\Delta$ <i>fliA</i> /pJMB2032              | This study |
| JMB2142 | 81-176 <i>rpsL</i> <sup>Sm</sup> $\Delta$ <i>astA</i> $\Delta$ <i>fliF</i> /pJMB1519                                   | This study |

|         |                                                                                        |            |
|---------|----------------------------------------------------------------------------------------|------------|
| JMB2151 | 81-176 <i>rpsL</i> <sup>Sm</sup> $\Delta astA \Delta fliG flaB::astA-kan$<br>/pJMB2071 | This study |
| JMB2154 | 81-176 <i>rpsL</i> <sup>Sm</sup> $\Delta astA \Delta fliG flaB::astA-kan$<br>/pJMB2074 | This study |
| JMB2157 | 81-176 <i>rpsL</i> <sup>Sm</sup> $\Delta astA fliG_{\Delta N^{10AA}}$                  | This study |
| JMB2163 | 81-176 <i>rpsL</i> <sup>Sm</sup> $\Delta astA \Delta fliF flaB::astA-kan$<br>/pJMB1518 | This study |
| JMB2166 | 81-176 <i>rpsL</i> <sup>Sm</sup> $\Delta astA \Delta fliF flaB::astA-kan$<br>/pJMB1560 | This study |
| JMB2169 | 81-176 <i>rpsL</i> <sup>Sm</sup> $\Delta astA \Delta fliF flaB::astA-kan$<br>/pJMB1561 | This study |
| JMB2172 | 81-176 <i>rpsL</i> <sup>Sm</sup> $\Delta astA \Delta fliF flaB::astA-kan$<br>/pJMB1505 | This study |
| JMB2175 | 81-176 <i>rpsL</i> <sup>Sm</sup> $\Delta astA \Delta fliF flaB::astA-kan$<br>/pJMB1519 | This study |
| JMB2203 | 81-176 <i>rpsL</i> <sup>Sm</sup> $\Delta astA \Delta fliG$ /pCE107                     | This study |
| JMB2206 | 81-176 <i>rpsL</i> <sup>Sm</sup> $\Delta astA fliG_{\Delta N^{10AA}} flaB::astA-kan$   | This study |
| JMB2230 | 81-176 <i>rpsL</i> <sup>Sm</sup> $\Delta astA \Delta fliF$ /pJMB2212                   | This study |
| DAR125  | 81-176 <i>rpsL</i> <sup>Sm</sup> $\Delta astA \Delta fliQ$                             | This study |
| DAR152  | 81-176 <i>rpsL</i> <sup>Sm</sup> $\Delta astA \Delta fliQ flaB::astA-kan$              | This study |
| SNJ915  | 81-176 <i>rpsL</i> <sup>Sm</sup> $\Delta astA \Delta fliE$                             | (6)        |
| SNJ925  | 81-176 <i>rpsL</i> <sup>Sm</sup> $\Delta astA \Delta flgG$                             | (7)        |
| SNJ931  | 81-176 <i>rpsL</i> <sup>Sm</sup> $\Delta astA flgF::cat-rpsL$                          | This study |
| SNJ935  | 81-176 <i>rpsL</i> <sup>Sm</sup> $\Delta astA \Delta flgG flaB::astA-kan$              | This study |
| SNJ1043 | 81-176 <i>rpsL</i> <sup>Sm</sup> $\Delta astA flgB::cat-rpsL$                          | This study |
| SNJ1046 | 81-176 <i>rpsL</i> <sup>Sm</sup> $\Delta astA \Delta flgB$                             | This study |
| SNJ1048 | 81-176 <i>rpsL</i> <sup>Sm</sup> $\Delta astA \Delta flgC$                             | This study |
| ALU107  | 81-176 <i>rpsL</i> <sup>Sm</sup> $\Delta astA flgH::cat-rpsL$                          | This study |
