# Supplementary material for: A Regulatory Checkpoint during Flagellar Biogenesis in Campylobacter jejuni Initiates Signal Transduction To Activate Transcription of Flagellar Genes
Source: PubMed Central journal article supplement — mBio. 2013 Sep 3;4(5):e00432-13. doi: 10.1128/mBio.00432-13 (PMC3760246; doi:10.1128/mbio.00432-13), 2013-09-03
Supplement: mbo004131615st2.pdf [file mbo004131615st2.pdf]

**Table S2. Plasmids used in this study**

| Plasmid   | Genotype/Description                                                                                                                                                                          | Source/Reference    |
|-----------|-----------------------------------------------------------------------------------------------------------------------------------------------------------------------------------------------|---------------------|
| pUC19     | Amp <sup>R</sup>                                                                                                                                                                              | New England Biolabs |
| pBR322    | Amp <sup>R</sup> ; Tc <sup>R</sup>                                                                                                                                                            | New England Biolabs |
| pGEX-4T-2 | Amp <sup>R</sup> ; GST-fusion vector                                                                                                                                                          | GE Healthcare       |
| pT7-7     | Amp <sup>R</sup>                                                                                                                                                                              | (15)                |
| pRY109    | Amp <sup>R</sup> ; Cm <sup>R</sup> ; source of the <i>Campylobacter cat</i> cassette                                                                                                          | (16)                |
| pRY112    | Cm <sup>R</sup> ; <i>E. coli</i> - <i>C. jejuni</i> shuttle vector                                                                                                                            | (16)                |
| pECO102   | pRY112 with <i>cat</i> promoter and start codon followed by in-frame BamHI site                                                                                                               | (17)                |
| pCE107    | Km <sup>R</sup> ; contains <i>flaA</i> promoter to drive expression of ZSGreen GFP; contains in-frame BamHI site between promoter and GFP gene to generate C-terminal GFP fusions to proteins | (13, 18)            |
| pDAR965   | pRY112 with <i>cat</i> promoter to drive expression N-terminal FLAG-tagged proteins; contains <i>flaA</i> start codon and FLAG tag followed by in-frame BamHI site                            | This study          |
| pDRH265   | pUC19:: <i>cat-rpsL</i>                                                                                                                                                                       | (8)                 |
| pDRH275   | pUC19 with the 81-176 <i>flgBCfliE</i> locus and 750 bp of flanking sequence cloned into the BamHI site                                                                                       | This study          |
| pDRH414   | pUC19 containing <i>astA::cat-rpsL</i>                                                                                                                                                        | (4)                 |
| pDRH449   | pUC19 containing $\Delta$ <i>astA</i>                                                                                                                                                         | (4)                 |
| pDRH665   | pUC19 containing <i>flaB::astA-kan</i>                                                                                                                                                        | (4)                 |
| pDRH1348  | pUC19 with the 81-176 <i>flgI</i> locus and 750 bp of flanking sequence cloned into the BamHI site                                                                                            | This study          |
| pDRH1349  | pUC19 with the 81-176 <i>flgF</i> locus and 750 bp of flanking sequence cloned into the BamHI site                                                                                            | This study          |
| pDRH1454  | pUC19:: <i>fliQ</i> locus                                                                                                                                                                     | (6)                 |
| pDRH1777  | pUC19:: <i>fliF</i> locus                                                                                                                                                                     | (7)                 |
| pDRH1814  | pUC19 containing <i>fliF::cat-rpsL</i>                                                                                                                                                        | (6)                 |
| pDRH1878  | pUC19 with the 81-176 <i>flgH</i> locus and 750 bp of flanking sequence cloned into the BamHI site                                                                                            | This study          |
| pDRH2073  | pUC19 containing $\Delta$ <i>fliF</i>                                                                                                                                                         | (6)                 |
| pDRH2266  | pGEX-4T-2 with the 81-176 <i>fliF</i> coding sequence cloned into the BamHI site                                                                                                              | This study          |
| pDRH2309  | pECO102 with the 81-176 <i>fliF</i> coding sequence from codon two to the stop codon cloned into the BamHI site                                                                               | This study          |
| pDRH2407  | pUC19:: <i>fliG</i> locus                                                                                                                                                                     | (7)                 |
| pDRH2422  | pUC19 with an in-frame fusion of the <i>flgH</i> the start and stop codons                                                                                                                    | This study          |
| pDRH2504  | pUC19 with an in-frame fusion of the <i>flgF</i> start and stop codons                                                                                                                        | This study          |

|          |                                                                                                                                                                                                    |            |
|----------|----------------------------------------------------------------------------------------------------------------------------------------------------------------------------------------------------|------------|
| pDRH2534 | pUC19 with a <i>cat-rpsL</i> cassette cloned into the EcoRV site of <i>flgF</i>                                                                                                                    | This study |
| pDRH2536 | pUC19 with a <i>cat-rpsL</i> cassette cloned into the EcoRV site of <i>flgI</i>                                                                                                                    | This study |
| pJMB531  | pUC19:: <i>fliM</i> locus                                                                                                                                                                          | (6)        |
| pJMB533  | pUC19 with the 81-176 <i>fliN</i> and 750 bp of flanking sequence cloned into the BamHI site                                                                                                       | This study |
| pJMB537  | pUC19 with a <i>cat-rpsL</i> inserted into the EcoRV site of <i>fliN</i>                                                                                                                           | This study |
| pJMB572  | pUC19 with a <i>cat-rpsL</i> inserted into the EcoRV site of <i>fliM</i>                                                                                                                           | (6)        |
| pJMB1204 | pUC19 with an in-frame deletion of codons 38 - 297 of <i>fliG</i>                                                                                                                                  | This study |
| pJMB1401 | pUC19 with an in-frame deletion of codons 4 - 334 of <i>fliM</i>                                                                                                                                   | This study |
| pJMB1505 | pECO102 with the 81-176 <i>fliF</i> coding sequence from codon 19 to the stop codon encoding FliF $\Delta$ D2-T18 cloned into the BamHI and PstI sites                                             | This study |
| pJMB1506 | pT7-7 with the 81-176 <i>fliG</i> coding sequence and a C-terminal 6XHis-tag cloned into the BamHI site                                                                                            | This study |
| pJMB1512 | pUC19 with an in-frame deletion of codons 112-319 of <i>fliG</i> encoding FliG $\Delta$ MCD                                                                                                        | This study |
| pJMB1513 | pUC19 with an in-frame deletion of codons 209-319 of <i>fliG</i> encoding FliG $\Delta$ CTD                                                                                                        | This study |
| pJMB1516 | pUC19 with an in-frame deletion of codons 510-521 of <i>fliF</i> encoding FliF $\Delta$ G511-S520                                                                                                  | This study |
| pJMB1518 | pECO102 with the 81-176 <i>fliF</i> coding sequence from codon 2 to 478 encoding FliF $\Delta$ C' 82aa cloned into BamHI and PstI sites                                                            | This study |
| pJMB1519 | pECO102 with the 81-176 <i>fliF</i> coding sequence from codon 2 to 554 encoding FliF $\Delta$ C' 6aa cloned into BamHI and PstI sites                                                             | This study |
| pJMB1560 | pECO102 with the 81-176 <i>fliF</i> coding sequence from codon 2 to stop codon encoding FliF $\Delta$ E557A cloned into BamHI and PstI sites                                                       | This study |
| pJMB1561 | pECO102 with the 81-176 <i>fliF</i> coding sequence from codon 2 to stop codon encoding FliF $\Delta$ K558A cloned into BamHI and PstI sites                                                       | This study |
| pJMB1609 | pECO102 with the 81-176 <i>fliF</i> coding sequence from codon two to stop and containing an in-frame deletion of codons 510-521 encoding FliF $\Delta$ G511-S520 cloned into BamHI and PstI sites | This study |
| pJMB1635 | pBR322 with the 81-176 <i>fliY</i> locus with 750 bp of flanking sequence cloned into the BamHI site                                                                                               | This study |
| pJMB1729 | pUC19 with an in-frame deletion of codons 112-207                                                                                                                                                  | This study |

|          |                                                                                                                              |            |
|----------|------------------------------------------------------------------------------------------------------------------------------|------------|
|          | of <i>fliG</i> encoding FliG <sub>ΔMD</sub>                                                                                  |            |
| pJMB1731 | pUC19 with an in-frame deletion of codons 3-110 of <i>fliG</i> encoding FliG <sub>ΔNTD</sub>                                 | This study |
| pJMB1746 | pCE107 with the 81-176 <i>fliG</i> coding sequence and a C-terminal FLAG tag with a stop codon inserted into the BamHI site  | This study |
| pJMB1827 | pUC19 with an in-frame deletion of codons 175 and 176 of <i>fliF</i> encoding FliF <sub>ΔA175-S176</sub>                     | This study |
| pJMB1842 | pCE107 with the 81-176 <i>fliG</i> coding sequence from start to stop codons cloned into the BamHI site                      | This study |
| pJMB1971 | pBR322 with a mutation of bases T <sub>132</sub> A and A <sub>133</sub> T to create a SmaI site in <i>fliY</i>               | This study |
| pJMB1977 | pT7-7 with the 81-176 <i>fliY</i> coding sequence and a C-terminal 6XHis-tag cloned into the BamHI site                      | This study |
| pJMB1980 | pBR322 with a <i>cat-rpsL</i> cassette cloned into the SmaI site of <i>fliY</i>                                              | This study |
| pJMB2032 | pDAR965 with the 81-176 <i>fliF</i> coding sequence and a N-terminal FLAG tag cloned into the BamHI site                     | This study |
| pJMB2071 | pRY112 with the promoter of <i>flaA</i> fused to the <i>fliG</i> coding sequence cloned into the NcoI and XhoI sites         | This study |
| pJMB2074 | pRY112 with the <i>flaA</i> promoter from pCE107 cloned the NotI and XhoI sites                                              | This study |
| pJMB2119 | pUC19 with an in-frame deletion of codon 2 to codon 11 of <i>fliG</i> encoding FliG <sub>ΔN<sup>10</sup>AA</sub>             | This study |
| pJMB2212 | pDAR965 with <i>fliF</i> <sub>ΔA175-S176</sub> encoding FLAG-FliF <sub>ΔA175-S176</sub> cloned into the BamHI and PstI sites | This study |
| pSNJ356  | pUC19 containing <i>flgB::cat-rpsL</i>                                                                                       | (5)        |
| pSNJ919  | pUC19 with an in-frame deletion of the start and stop codons of <i>flgB</i>                                                  | This study |
| pSNJ1009 | pUC19 with an in-frame deletion of the start and stop codons of <i>flgC</i>                                                  | This study |
| pSMS469  | pUC19 containing <i>fliQ::cat-rpsL</i>                                                                                       | (6)        |
| pSMS443  | pUC19 containing Δ <i>fliQ</i>                                                                                               | (6)        |
| pALU101  | pUC19 with a <i>cat-rpsL</i> cassette cloned into the PmlI site within <i>flgH</i>                                           | This study |
| pALU115  | pUC19 containing <i>fliG::cat-rpsL</i>                                                                                       | (6)        |
